# Supplementary material for: Insights into Facilitated Subcutaneous Immunoglobulin Use in Patients with Secondary Immunodeficiency Diseases: A FIGARO Subgroup Analysis
Source: MDPI journal article supplement (doi:10.3390/cancers15184524), 2023-09-12
Supplement: s1 [file s1]

**Supplementary Table S1. Rate of ASBI events and other bacterial infection events at inclusion**

| Parameter                                                                | SID Overall Population <sup>a</sup><br>(n=31) | 18-64 Years<br>(n=15) | ≥65 Years<br>(n=15) |
|--------------------------------------------------------------------------|-----------------------------------------------|-----------------------|---------------------|
| <b>ASBI events in the past 12 months, n (%)</b>                          |                                               |                       |                     |
| No                                                                       | 21 (67.7)                                     | 11 (73.3)             | 10 (66.7)           |
| Yes                                                                      | 10 (32.3)                                     | 4 (26.7)              | 5 (33.3)            |
| <b>ASBI events (MedDRA code), n (%)<sup>b</sup></b>                      |                                               |                       |                     |
| Diarrhea, <i>Clostridium difficile</i>                                   | 1 (7.1)                                       | -                     | -                   |
| Febrile neutropenia                                                      | 2 (14.3)                                      | 1 (20.0)              | 1 (12.5)            |
| Increased susceptibility to infections NOS                               | 1 (7.1)                                       | 1 (20.0)              | -                   |
| Infection of kidney, unspecified                                         | 1 (7.1)                                       | 1 (20.0)              | -                   |
| Pneumonia                                                                | 5 (35.7)                                      | -                     | 5 (62.5)            |
| Pseudomonas infection NOS                                                | 1 (7.1)                                       | -                     | 1 (12.5)            |
| Tonsillitis                                                              | 2 (14.3)                                      | 1 (20.0)              | 1 (12.5)            |
| Puncture site abscess                                                    | 1 (7.1)                                       | 1 (20.0)              | -                   |
| Total                                                                    | 14 (100.0)                                    | 5 (100.0)             | 8 (100.0)           |
| <b>Other bacterial infection events, n (%)</b>                           |                                               |                       |                     |
| No                                                                       | 20 (64.5)                                     | 9 (60.0)              | 10 (66.7)           |
| Yes                                                                      | 11 (35.5)                                     | 6 (40.0)              | 5 (33.3)            |
| <b>Other bacterial infection events (MedDRA code), n (%)<sup>b</sup></b> |                                               |                       |                     |
| Acute bronchitis                                                         | 4 (14.8)                                      | 3 (15.8)              | 1 (12.5)            |
| Gastroenteritis                                                          | 1 (3.7)                                       | 1 (5.3)               | -                   |
| Infection bacterial                                                      | 2 (7.4)                                       | 2 (10.5)              | -                   |
| Lower respiratory tract infection                                        | 3 (11.1)                                      | -                     | 3 (37.5)            |
| Nasopharyngitis                                                          | 1 (3.7)                                       | 1 (5.3)               | -                   |
| Otitis                                                                   | 1 (3.7)                                       | 1 (5.3)               | -                   |
| Parotitis                                                                | 1 (3.7)                                       | 1 (5.3)               | -                   |
| Pharyngitis                                                              | 1 (3.7)                                       | 1 (5.3)               | -                   |
| Pneumonia                                                                | 3 (11.1)                                      | 2 (10.5)              | 1 (12.5)            |
| Productive cough                                                         | 1 (3.7)                                       | 1 (5.3)               | -                   |
| Prostatitis                                                              | 1 (3.7)                                       | -                     | 1 (12.5)            |
| Pyelonephritis                                                           | 1 (3.7)                                       | 1 (5.3)               | -                   |
| Sinusitis                                                                | 7 (25.9)                                      | 5 (26.3)              | 2 (25.0)            |
| Total                                                                    | 27 (100.0)                                    | 19 (100.0)            | 8 (100.0)           |

<sup>a</sup>Overall SID population includes 1 pediatric patient. This patient was not included in the SID sub-analysis.

<sup>b</sup>Multiple responses possible.

ASBI, acute severe bacterial infection; MedDRA, Medical Dictionary for Regulatory Activities; NOS, not otherwise specified; SID, secondary immunodeficiency disease.
